# Supplementary material for: Color Intensity of the Red-Fleshed Berry Phenotype of Vitis vinifera Teinturier Grapes Varies Due to a 408 bp Duplication in the Promoter of VvmybA1
Source: PubMed Central journal article supplement (PMC7464560; doi:10.3390/genes11080891), 2020-08-05
Supplement: genes-11-00891-s001.pdf [file genes-11-00891-s001.pdf]

Supplements

# Color intensity of the red-fleshed berry phenotype of *Vitis vinifera* teinturier grapes varies due to a 408 bp duplication in the promoter of *VvmybA1*

Franco Röckel<sup>1</sup>, Carina Mook<sup>1</sup>, Ulrike Braun<sup>1</sup>, Florian Schwander<sup>1</sup>, Peter Cousins<sup>2</sup>, Erika Maul<sup>1</sup>, Reinhard Töpfer<sup>1</sup>, Ludger Hausmann<sup>1,\*</sup>

<sup>1</sup> Institute for Grapevine Breeding Geilweilerhof, Julius Kühn-Institut, Federal Research Centre for Cultivated Plants, 76833 Siebeldingen, Germany; franco.roeckel@julius-kuehn.de (F.R.); carina.mook@julius-kuehn.de (C.M.); ulrike.braun@julius-kuehn.de (U.B.); florian.schwander@julius-kuehn.de (F.S.); erika.maul@julius-kuehn.de (E.M.); reinhard.toepfer@julius-kuehn.de (R.T.)

<sup>2</sup> E. & J. Gallo Winery, Modesto, California 95354, United States of America; peter.cousins@ejgallo.com (P.C.)

\* Correspondence: ludger.hausmann@julius-kuehn.de; Tel.: +49-6345-41-117

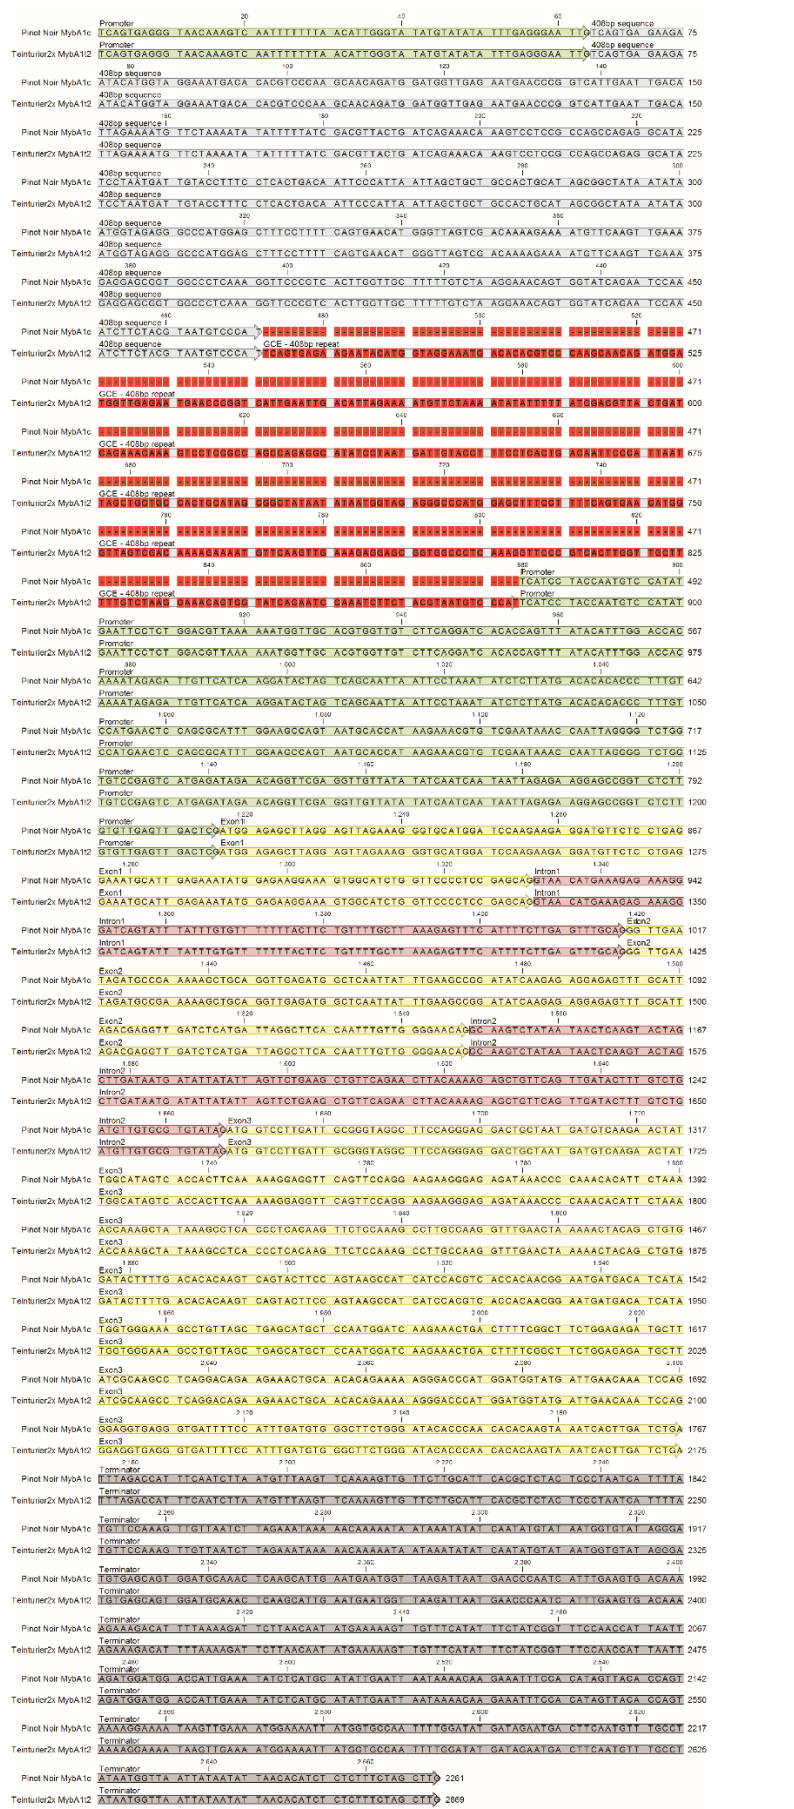

**Figure S1.** Alignment of the *MybA1t2* allele of ‘Teinturier’ and the *MybA1c* allele of ‘Pinot Noir’. Differences are indicated in red.

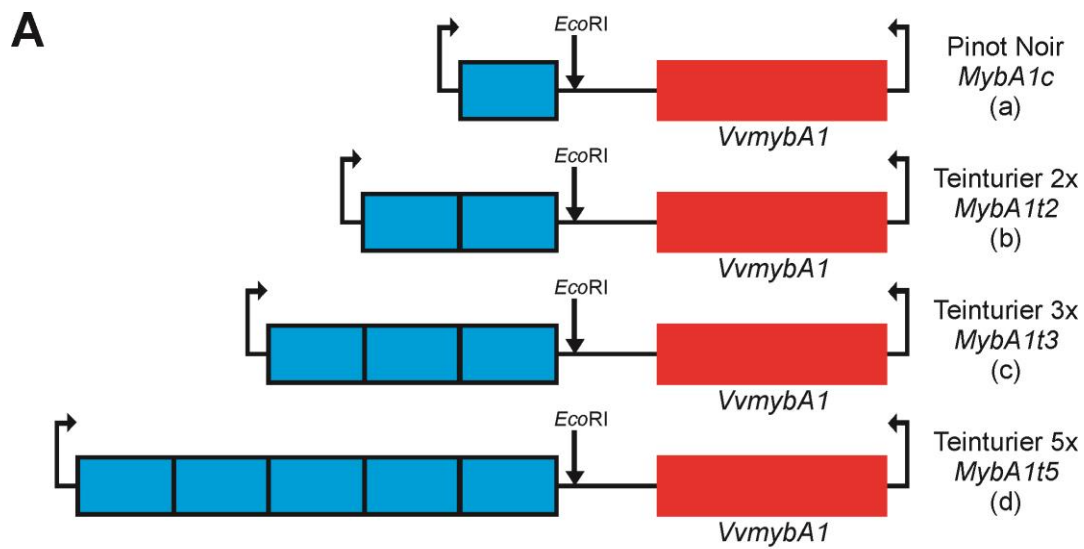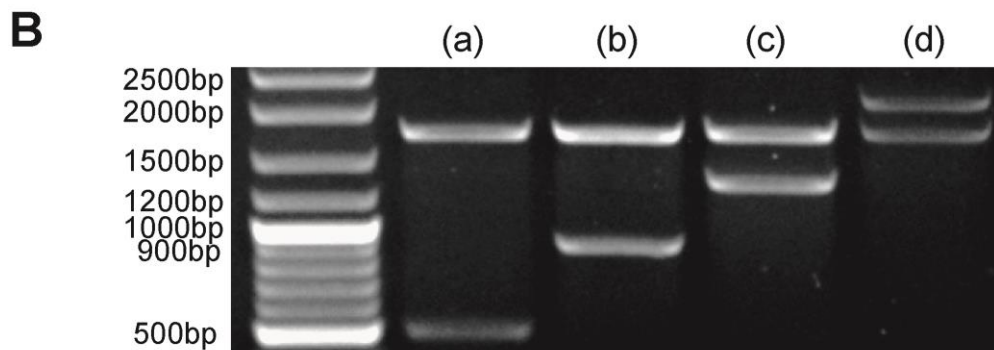

**C**

| Allele         | Length [bp] | Fragment 1 [bp] | Fragment 2 [bp] | Repeat number |
|----------------|-------------|-----------------|-----------------|---------------|
| <i>MybA1c</i>  | 2261        | 1768            | 493             | 1 (wildtype)  |
| <i>MybA1t2</i> | 2669        | 1768            | 901             | 2             |
| <i>MybA1t3</i> | 3077        | 1768            | 1309            | 3             |
| <i>MybA1t5</i> | 3893        | 1768            | 2125            | 5             |

**Figure S2.** *EcoRI* restriction analysis of the *VvmybA1* amplicons. Leaf-DNA sample ('Pinot Noir') and the root-DNA samples ('Teinturier 2x', 'Teinturier 3x' and 'Teinturier 5x') shown in Fig. 1. (A) Schematic overview of the amplicons with the relative position of the *EcoRI* restriction site. (B) Agarose gel of the digested amplicons. (C) Fragment lengths based on amplicon sequencing.

**Table S1.** Analyzed grapevine accessions and their origin according to the VIVC database ([www.vivc.de](http://www.vivc.de)). Tissue types used for anthocyanin analysis are indicated.

| Prime name                | Variety number VIVC | Accession name            | Accession number | Origin           | Anthocyanin measurements      | Referred in this study as |
|---------------------------|---------------------|---------------------------|------------------|------------------|-------------------------------|---------------------------|
| Pinot Noir                | 9279                | Spaetburgunder M242       | DEU098-1980-006  | JKI Siebeldingen | berry skin, berry flesh       |                           |
| Pinot Gris                | 9275                | Pinot Gris Cl. Dunkelgrau | DEU098-1980-058  | JKI Siebeldingen | leaf                          |                           |
| Pinot Teinturier          | 9283                | Pinot Teinturier          | DEU454-L-28-4-2  | HGU Geisenheim   |                               |                           |
| Gamay Teinturier de Bouze | 4379                | Gamay Teinturier de Bouze | DEU098-1980-196  | JKI Siebeldingen |                               |                           |
| Teinturier                | 12304               | Teinturier                | DEU098-1993-213  | JKI Siebeldingen | leaf, berry skin, berry flesh | Teinturier 2x             |
| Teinturier                | 12304               | Farbtraube                | DEU098-2002-003  | JKI Siebeldingen |                               |                           |
| Teinturier                | 12304               | Farbtraube                | DEU098-2011-063  | JKI Siebeldingen |                               |                           |
| Teinturier                | 12304               | Farbtraube                | DEU363-282       | DLR Neustadt     |                               |                           |
| Teinturier                | 12304               | Färbertraube              | DEU454-L-9-4-2   | HGU Geisenheim   |                               |                           |
| Teinturier                | 12304               | Teinturier mâle           | DEU456-1068      | LVWO Weinsberg   |                               |                           |
| Teinturier                | 12304               | Färbertraube              | -                | BSA Hassloch     |                               |                           |
| Teinturier                | 12304               | Farbtraube (Fröhlich)     | -                | BSA Hassloch     |                               |                           |
| Teinturier                | 12304               | Plant rouge femelle       | FRA139-303Mtp2   | INRA Vassal      |                               |                           |
| Teinturier                | 12304               | Serzial                   | FRA139-303Mtp6   | INRA Vassal      |                               |                           |
| Teinturier                | 12304               | Teinturier                | -                | BSA Hassloch     | leaf                          | Teinturier 3x             |
| Teinturier                | 12304               | Plant rouge mâle          | FRA139-303Mtp1   | INRA Vassal      |                               |                           |
| Teinturier                | 12304               | Teinturier du Cher PVM    | FRA139-0Mtp1749  | INRA Vassal      |                               |                           |
| Teinturier                | 12304               | Rubindraube               | DEU456-880       | LVWO Weinsberg   | leaf                          | Teinturier 5x             |
| Teinturier                | 12304               | Teinturier du Cher        | FRA139-303Mtp7   | INRA Vassal      |                               |                           |
| Dunkelfelder              | 3724                | Dunkelfelder              | DEU098-1980-014  | JKI Siebeldingen | berry skin, berry flesh       |                           |
| Rubired                   | 10308               | Rubired                   | DEU098-1991-123  | JKI Siebeldingen |                               |                           |
| Titan                     | 12531               | Titan                     | DEU098-1980-459  | JKI Siebeldingen |                               |                           |
| Teinturier Luebeck        | 23366               | Teinturier male           | DEU098-1995-052  | JKI Siebeldingen |                               |                           |
| Seibel 5437               | 11110               | Seibel 5437               | DEU098-2003-093  | JKI Siebeldingen |                               |                           |
| Golubok                   | 4888                | Golubok                   | DEU098-1988-077  | JKI Siebeldingen |                               |                           |
| Farbfraenkisch            | 4053                | Farbfraenkisch            | DEU454-L-27-5-2  | HGU Geisenheim   |                               |                           |
| Alicante Henri Bouschet   | 304                 | Alicante Henri Bouschet   | DEU098-1990-007  | JKI Siebeldingen |                               |                           |

|                                     |       |                    |                 |                  |                         |
|-------------------------------------|-------|--------------------|-----------------|------------------|-------------------------|
| Bouschet Petit                      | 1619  | Bouschet Petit     | DEU098-2001-016 | JKI Siebeldingen |                         |
| Karmin                              | 5999  | Karmin             | DEU098-1991-143 | JKI Siebeldingen |                         |
| Biborkadarka                        | 1339  | Biborkadarka       | DEU098-1991-136 | JKI Siebeldingen |                         |
| Kurucver                            | 6573  | Kurucver           | DEU098-1991-149 | JKI Siebeldingen |                         |
| Royalty                             | 10288 | Royalty            | DEU098-1991-119 | JKI Siebeldingen |                         |
| Grand Noir                          | 5012  | Grand Noir         | DEU098-1980-125 | JKI Siebeldingen |                         |
| Karmrahyut                          | 6002  | Karmrahyut         | DEU098-1988-079 | JKI Siebeldingen |                         |
| Morrastel Bouschet                  | 8009  | Morrastel Bouschet | DEU098-1980-268 | JKI Siebeldingen |                         |
| Kolor                               | 6388  | Kolor              | DEU098-1980-033 | JKI Siebeldingen | berry skin, berry flesh |
| Deckrot                             | 3482  | Deckrot            | DEU098-1980-010 | JKI Siebeldingen | berry skin, berry flesh |
| Freiburg 54- 64                     | 4240  | Freiburg 54- 64    | DEU098-1980-671 | JKI Siebeldingen |                         |
| Teinturier femelle (non identified) | 24854 | Teinturier femelle | DEU456-1127     | LVWO Weinsberg   |                         |
| Accent                              | 20540 | Accent             | DEU098-2013-031 | JKI Siebeldingen |                         |
| Dakapo                              | 14728 | Dakapo             | DEU098-2011-046 | JKI Siebeldingen |                         |
| Cabernet Mitos                      | 15499 | Cabernet Mitos     | DEU098-2010-046 | JKI Siebeldingen | berry skin, berry flesh |
| Palas                               | 16871 | Palas              | DEU098-2010-049 | JKI Siebeldingen | berry skin, berry flesh |

---

**Table S2.** Information of primers used for berry color specific SSR-marker analysis. The physical position refers to the 12x version of the PN40024 reference genome ([http://ensembl.gramene.org/Vitis\\_vinifera/Info/Index](http://ensembl.gramene.org/Vitis_vinifera/Info/Index)).

| Marker name | Chromosome | Physical position | Forward primer         | Reverse primer            | Reference                           |
|-------------|------------|-------------------|------------------------|---------------------------|-------------------------------------|
| GF02-55     | 2          | 13998165          | AAAATTGAAGGACAGGAGGAGG | GCAAGGCTGGTCTACTCAGAAA    | Huber <i>et al.</i> (2016)          |
| VVNTM1      | 2          | 14149178          | CCACGCCACTATTGCTAAAC   | TGCACCGTATCAAGATCATGTC    | Fournier-Level <i>et al.</i> (2009) |
| GF02-61     | 2          | 14187240          | GCAAACCTCCAGAACCTGATTT | TATTGGTCGAGAAGGAATGTGG    | This study                          |
| GF02-62     | 2          | 14192053          | GGGATTTGTTAAGGAGATTTGC | GATGACAGTTCAGAGGTTGGC     | This study                          |
| GF02-68     | 2          | 14252332          | CCCCTGCCATCTCCATGC     | GGTCGTTGCATCATTTTCTCCA    | This study                          |
| VVNTM5      | 2          | 14325217          | AGGAGGAATCCACATCAAAGA  | TGATTCAAAGGAATAATAACCATCA | Fournier-Level <i>et al.</i> (2009) |

**Table S3.** Genotypic data of 15 SSR loci from the analyzed grapevine accessions.

| Prime name                 | Genome-wide SSR-markers used for genotyping |         |         |         |         |         |         |         |         | SSR-markers specific for the berry color locus on chr 2 |         |         |         |         |         |
|----------------------------|---------------------------------------------|---------|---------|---------|---------|---------|---------|---------|---------|---------------------------------------------------------|---------|---------|---------|---------|---------|
|                            | VVS2                                        | VVMD5   | VVMD7   | VVMD25  | VVMD27  | VVMD28  | VVMD32  | VrZag62 | VrZag79 | GF02-55                                                 | VVNTM1  | GF02-61 | GF02-62 | GF02-68 | VVNTM5  |
| Pinot Noir                 | 137:151                                     | 230:240 | 239:243 | 239:249 | 186:190 | 218:236 | 240:272 | 188:194 | 239:245 | 215:229                                                 | 163:169 | 283:286 | 373:385 | 374:390 | 294:308 |
| Teinturier (all 15 clones) | 137:151                                     | 240:240 | 239:243 | 239:249 | 180:190 | 228:236 | 272:272 | 188:194 | 245:255 | 215:229                                                 | 163:169 | 283:286 | 373:385 | 374:390 | 294:308 |
| Dunkelfelder               | 135:151                                     | 238:240 | 243:247 | 249:255 | 180:195 | 228:244 | 240:272 | 188:204 | 249:255 | 217:229                                                 | 163:169 | 283:286 | 373:385 | 374:390 | 294:308 |
| Kolor                      | 151:151                                     | 240:240 | 239:243 | 249:249 | 180:186 | 218:236 | 272:272 | 188:194 | 239:255 | 215:229                                                 | 163:169 | 283:286 | 373:385 | 374:390 | 294:308 |
| Deckrot                    | 137:151                                     | 230:240 | 239:243 | 249:249 | 190:190 | 218:236 | 240:272 | 188:194 | 245:245 | 215:229                                                 | 163:169 | 283:286 | 373:385 | 374:390 | 294:308 |
| Cabernet Mitos             | 137:143                                     | 228:240 | 239:239 | 239:249 | 180:195 | 228:246 | 250:272 | 194:194 | 251:255 | 217:229                                                 | 163:169 | 283:286 | 373:385 | 374:390 | 294:308 |
| Palas                      | 137:143                                     | 240:242 | 239:239 | 239:249 | 180:195 | 228:246 | 272:272 | 194:204 | 251:255 | 217:229                                                 | 163:169 | 283:286 | 373:385 | 374:390 | 294:308 |

**Table S4.** List of Likelihoods for the kinship of ‘Savagnin Blanc’, ‘Pinot Noir’ and ‘Teinturier’. Calculated with ML Relate (Kalinowski *et al.*, 2006) based on the marker dataset of Lacombe *et al.* (2013). Output Ln(Likelihood) for each of the four following relationships: U = unrelated; HS = half sibs; FS = full sibs; PO = parent / offspring. R = relationship with the highest likelihood; LnL(R) = log likelihood of R; Delta Ln(L) = log likelihood differences for the other relationships compared to the highest likelihood LnL(R).

| Variety 1      | Variety 2  | R  | LnL(R)  | Delta Ln(L) |      |      |              |
|----------------|------------|----|---------|-------------|------|------|--------------|
|                |            |    |         | U           | HS   | FS   | PO           |
| Savagnin Blanc | Teinturier | PO | -92.88  | 14.34       | 5.40 | 6.31 | -            |
| Savagnin Blanc | Pinot Noir | PO | -100.17 | 13.42       | 5.16 | 4.07 | -            |
| Teinturier     | Pinot Noir | FS | -97.72  | 9.79        | 2.66 | -    | Not possible |



**Table S5.** Anthocyanin composition [%] in leaf samples of 'Teinturier' clones with different GCE number. Cy-gl = cyanidin-3-O-glucoside; Pe-gl = peonidin-3-O-glucoside; Dp-gl = delphinidin-3-O-glucoside; Pt-gl = petunidin-3-O-glucoside; Mv-gl = malvidin-3-O-glucoside; ayl = acetylated 3-O-glucoside anthocyanins; cum = coumarylated 3-O-glucoside anthocyanins.

| Clone         | Cy-gl      | Pe-gl      | Dp-gl     | Pt-gl     | Mv-gl      | Cy-ayl | Pe-ayl    | Dp-ayl    | Pt-ayl    | Mv-ayl    | Cy-cum    | Pe-cum    | Dp-cum    | Pt-cum    | Mv-cum    |
|---------------|------------|------------|-----------|-----------|------------|--------|-----------|-----------|-----------|-----------|-----------|-----------|-----------|-----------|-----------|
| Teinturier 2x | 21.87±4.54 | 33.45±3.29 | 8.01±1.25 | 5.11±0.8  | 13.85±3.18 | -      | 0.75±0.39 | -         | -         | -         | 5.33±1.19 | 5.81±0.65 | 2.13±0.63 | 1.27±0.13 | 2.43±0.66 |
| Teinturier 3x | 13.28±2.36 | 33.54±3.05 | 6.79±0.75 | 5.49±0.25 | 19.62±1.86 | -      | 1.04±0.14 | 0.36±0.11 | 0.38±0.07 | 0.77±0.18 | 3.68±0.73 | 6.81±0.97 | 1.74±0.31 | 1.67±0.29 | 4.83±1.27 |
| Teinturier 5x | 7.53±1.08  | 33.79±2.15 | 5.02±0.32 | 4.94±0.37 | 28.2±1.96  | -      | 1.2±0.1   | 0.27±0.03 | 0.22±0.02 | 1.18±0.09 | 2.21±0.19 | 7.01±0.17 | 0.98±0.12 | 1.33±0.13 | 6.11±0.66 |
